# Supplementary material
Source: PubMed Central journal article supplement (PMC8420579)
Supplement: ECI-51-0-s001.pdf [file ECI-51-0-s001.pdf]

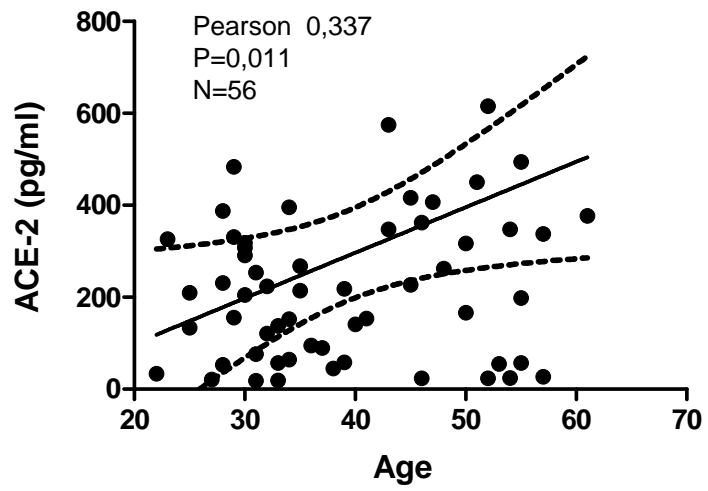

**Supplementary Figure S1:** Correlation between ACE-2 and age in all the health care workers analyzed in this study. Significant when  $p < 0,005$ .
